# Supplementary material for: Near and Far Transfer in Cognitive Training: A Second-Order Meta-Analysis
Source: Oxford University Press journal article supplement (doi:10.1525/collabra.203), 2019-01-01
Supplement: collabra-5-203-s5.pdf [file collabra-5-203-s5.pdf]

## Appendix E; List of Influential Studies

This section reports all the influential studies and explains the reasons why some studies were detected as influential cases.

### Model 1

**Bergman-Nutley and Klingberg (2014):** This study was an influential case in the omnibus meta-analysis. The study included a large sample ( $N = 430$ ) and yielded a large effect ( $g = 0.74$ ). Such a large effect was partly due to the baseline differences between groups and the consequent regression to the mean at post-test assessment.

**Borella et al. (2014):** This study was an influential case in the older-adult meta-analysis and omnibus meta-analysis. The study yielded a large mean effect ( $g = 1.00$ ) and included only non-active controls. The large effect explains why the study was an influential case.

**Dunning et al. (2013):** This study was an influential case in the LD-children meta-analysis (active subsample too) and omnibus meta-analysis (active subsample too). The study yielded a large mean effect ( $g = 1.48$ ). The large effect explains why the study was an influential case.

**Foster et al. (2014):** This study was an influential case in the omnibus meta-analysis (only active subsample). The study yielded a small mean effect ( $g = 0.14$ ) but included many outcome measures ( $k = 24$ ). Cheung and Chan's (2014) correction is a function of the number of  $k$  (the more  $k$ , the smaller sampling error variance). Therefore, despite being an influential case, the study was not an outlier.

**Holmes et al. (2009):** This study was an influential case in the LD-children meta-analysis (active subsample only). The study yielded a large mean effect ( $g = 1.62$ ). The large effect explains why the study was an influential case.

**Minear et al. (2012):** This study was an influential case in the omnibus meta-analysis (only active subsample). The study yielded a small mean effect ( $g = 0.21$ ) but included many outcome measures ( $k = 24$ ) and was thus associated with a small sampling error variance. Therefore, despite being an influential case, the study was not an outlier.

### **Models 2 and 3**

**Anderson-Hanley et al. (2012):** This study was an influential case in the omnibus meta-analysis of Model 3. The study yielded a small mean effect ( $g = 0.08$ ) but included many outcome measures ( $k = 13$ ) and was thus associated with a small sampling error variance. Therefore, despite being an influential case, the study was not an outlier.

**Ang et al. (2015):** This study was an influential case in the omnibus meta-analysis of Model 2. The study yielded a null mean effect ( $g = 0.00$ ) but included many outcome measures ( $k = 12$ ) and was thus associated with a small sampling error variance. Therefore, despite being an influential case, the study was not an outlier.

**Borella et al. (2010):** This study was an influential case in the older-adult meta-analysis, the omnibus meta-analysis in Model 2, and the omnibus meta-analysis in Model 3. The study yielded a large mean effect ( $g = 0.66$ ) and included only non-active controls. The large effect explains why the study was an influential case.

**Cantarella et al. (2016):** This study was an influential case in the omnibus meta-analysis in Model 2 and the omnibus meta-analysis in Model 3. The study yielded a large mean effect ( $g = 0.82$ ) and included only non-active controls. The large effect explains why the study was an influential case.

**Chooi and Thompson (2012):** This study was an influential case in the omnibus meta-analysis of Model 2. The study yielded a near-zero mean effect ( $g = 0.08$ ) but included many outcome measures ( $k = 20$ ) and was thus associated with a small sampling error variance. Therefore, despite being an influential case, the study was not an outlier.

**Estrada et al. (2015):** This study was an influential case in the omnibus meta-analysis of Model 2. The study yielded a near-zero mean effect ( $g = -0.04$ ) but had many participants ( $N = 363$ ) and was thus associated with a small sampling error variance. Therefore, despite being an influential case, the study was not an outlier.

**Guye and von Bastian (2017):** This study was an influential case in the omnibus meta-analysis of Model 2 and omnibus meta-analysis of Model 3. The study yielded a near-zero mean effect ( $g = -0.02$ ) but had many participants ( $N = 142$ ) and included many outcome measures ( $k = 15$ ) and was thus associated with a small sampling error variance. Therefore, despite being an influential case, the study was not an outlier.

**Hering et al. (2017):** This study was an influential case in the omnibus meta-analysis of Model 2. The study yielded a near-zero mean effect ( $g = -0.04$ ) but included many outcome measures ( $k = 14$ ) and was thus associated with a small sampling error variance. Therefore, despite being an influential case, the study was not an outlier.

**Jerrim et al. (2017):** This study was an influential case in the omnibus meta-analysis of Model 3. The study yielded a null effect ( $g = 0.00$ ) but included many outcome measures ( $k = 14$ ) and was thus associated with a small sampling error variance. Therefore, despite being an influential case, the study was not an outlier.

**Lee et al. (2012):** This study was an influential case in the omnibus meta-analysis of Model 3. The study yielded a small effect ( $g = 0.14$ ) but included many outcome measures ( $k = 28$ ) and was thus associated with a small sampling error variance. Moreover, the controls were non-active. Therefore, despite being an influential case, the study was not an outlier.

**Okagaki and Frensch (1994):** This study was an influential case in the omnibus meta-analysis of Model 3. The study yielded a larger-than-average mean effect ( $g = 0.53$ ). This was the reason why

the study was detected as an influential case. The larger-than-average mean effect was probably due to the fact that the controls were non-active.

**Portowitz et al. (2009):** This study was an influential case in music meta-analysis and the omnibus meta-analysis of Model 3. The study yielded a large mean effect ( $g = 1.30$ ). The larger-than-average mean effect was probably due to the fact that the controls were non-active.

**Rickard et al. (2012):** This study was an influential case in music meta-analysis and the omnibus meta-analysis of Model 3. The study yielded a near-zero mean effect ( $g = -0.02$ ) but included many outcome measures ( $k = 20$ ) and was thus associated with a small sampling error variance. Therefore, despite being an influential case, the study was not an outlier.

**Roden et al. (2014a):** This study was an influential case in music meta-analysis (only active subsample). The study yielded a larger-than-average mean effect ( $g = 0.56$ ). This was the reason why the study was detected as an influential case. This anomaly was probably due to the fact that the music-treated participants and the controls showed a large difference in IQ scores at baseline.

**Roden et al. (2014b):** This study was an influential case in music meta-analysis and the omnibus meta-analysis of Model 3. The study yielded a negative mean effect ( $g = -0.26$ ) but had many participants ( $N = 345$ ) and was thus associated with a small sampling error variance. Therefore, despite being an influential case, the study was not an outlier.

**Romano (2011):** This study was an influential case in the omnibus meta-analysis of Model 3. The study yielded a larger-than-average effect ( $g = 0.37$ ) and included many participants ( $N = 1788$ ) and was thus associated with a small sampling error variance. The larger-than-average mean effect was probably due to the fact that the controls were non-active.

**St Clair and Thompson et al. (2010):** This study was an influential case in the omnibus meta-analysis of Model 2. The study yielded a larger-than-average mean effect ( $g = 0.46$ ). The larger-than-average mean effect was probably due to the fact that the controls were non-active.

**Stephenson and Halpern (2013):** This study was an influential case in the omnibus meta-analysis of Model 2. The study yielded a larger-than-average mean effect ( $g = 0.30$ ) included many outcome measures ( $k = 28$ ) and was thus associated with a small sampling error variance. The larger-than-average mean effect was probably due to the fact that the controls were non-active.

**Trinchero and Sala (2016):** This study was an influential case in the omnibus meta-analysis of Model 3. The study yielded a larger-than-average mean effect ( $g = 0.22$ ) and included many participants ( $N = 661$ ) and was thus associated with a small sampling error variance. The larger-than-average mean effect was probably due to the fact that the controls were non-active.
